# Supplementary material for: The hydrogen-induced structural stability and promising electronic properties of molybdenum and tungsten dinitride nanosheets: a first-principles study
Source: Royal Society of Chemistry journal article supplement (doi:10.1039/c6tc02161a), 2016-01-01
Supplement: c6tc02161a1.pdf [file c6tc02161a1.pdf]

Electronic Supplementary Information (ESI) for

Hydrogen-induced Structural Stability and Promising Electronic  
Properties of Molybdenum and Tungsten Dinitride Nanosheets: A  
First-principles Study

Yanli Wang<sup>\*a</sup> and Yi Ding<sup>\*b</sup>

a. Department of Physics, Center for Optoelectronics Materials and Devices, Zhejiang Sci-Tech University, Xiasha College Park, Hangzhou, Zhejiang 310018, People's Republic of China. Email: wangyanli-04@tsinghua.org.cn

b. Department of Physics, Hangzhou Normal University, Hangzhou, Zhejiang 310036, People's Republic of China. E-mail: dingyi2001@tsinghua.org.cn

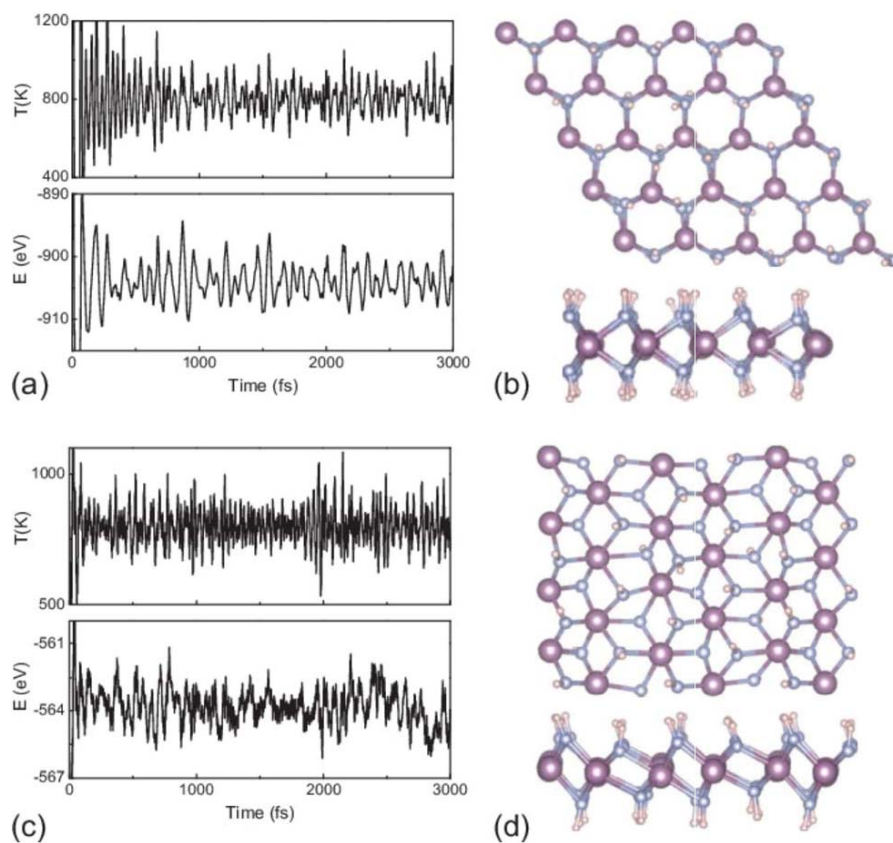

Figure S1. The fluctuations of temperature and free energy, as well as the final structures after the AIMD simulations for [(a), (b)]  $H$ - $\text{MoN}_2\text{H}_2$  and [(c), (d)]  $T_d$ - $\text{MoN}_2\text{H}_2$  sheets.

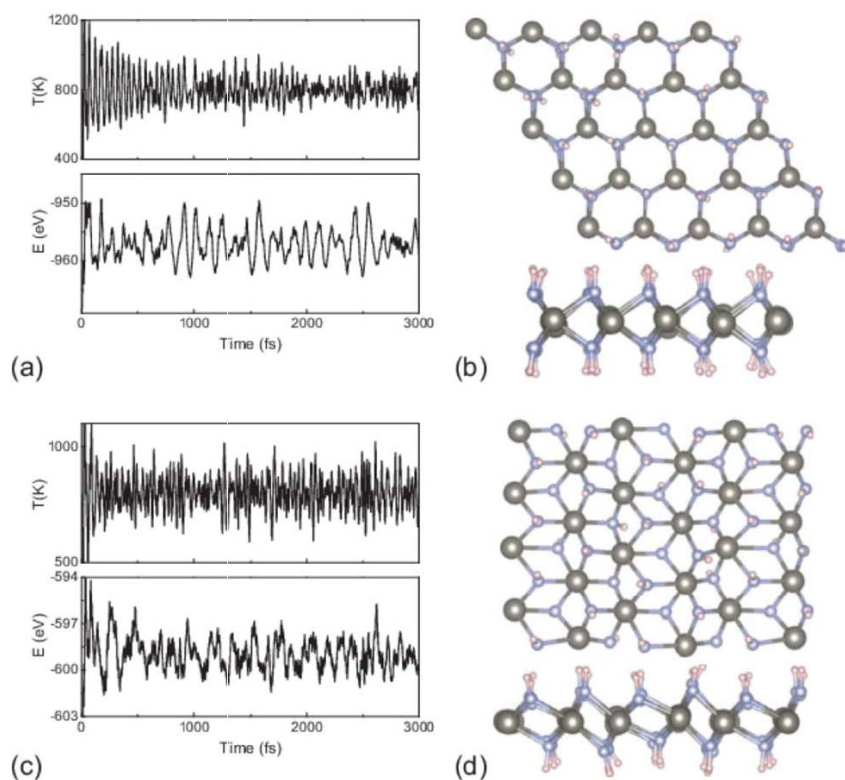

Figure S2. The fluctuations of temperature and free energy, as well as the final structures after the AIMD simulations for [(a), (b)]  $H$ - $\text{WN}_2\text{H}_2$  and [(c), (d)]  $T_d$ - $\text{WN}_2\text{H}_2$  sheets.

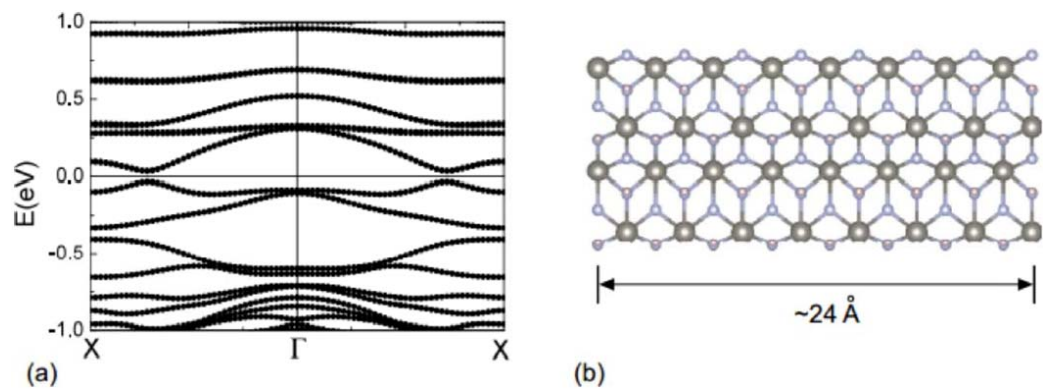

Figure S3. (a) The PBE+SOC bands and (b) atom structure of armchair  $T_d$ - $WN_2H_2$  nanoribbon.
